# Supplementary material for: Ecosystem physio-phenology revealed using circular statistics
Source: Copernicus journal article supplement (doi:10.5194/bg-2019-403), 2019-10-15
Supplement: Supplementary file 2 [file bg-2019-403-supplement.zip]

# Ecosystem physio-phenology revealed using circular statistics

## Supplementary information (I)

Daniel E. Pabon-Moreno<sup>1</sup>, Talie Musavi<sup>1</sup>, Mirco Migliavacca<sup>1</sup>, Markus Reichstein<sup>1,2</sup>,  
Christine Römermann<sup>2,3</sup>, and Miguel D. Mahecha<sup>1,2</sup>

<sup>1</sup>Max Planck Institute for Biogeochemistry, Hans-Knoell-Str. 10, 07745 Jena, Germany.

<sup>2</sup>German Centre for Integrative Biodiversity Research (iDiv), Deutscher Platz 5e, 04103 Leipzig, Germany.

<sup>3</sup>Friedrich Schiller University, Institute of Ecology and Evolution, Philosophenweg 16, D-07743 Jena, Germany.

### 1 Half-time sensitivity analysis (System memory to explain $\text{DOY}_{\text{GPPmax}}$ )

The optimum halftime parameter is estimated for each site showing that for most of the unimodal sites JS correlation is maximum when the halftime parameter takes values between 2 and 100 days. Per vegetation type Deciduous Broadleaf forest (DBF), Evergreen Needleleaf Forest (ENF) and Grassland (GRA) have similar values for the optimum half-time parameter (Figure A1.2). Evergreen Broadleaf Forest (EBF) presents a higher dispersion of half-time values between 12 to 146 days. Per climate classes, the Hot-summer Mediterranean ecosystem (Csa) has the highest variation. There are only 4 unimodal sites with an optimum half-time greater than 100 days: ZA-Kru, IT-Cpz, RU-Cok, and US-SRM. On the other hand, for the bimodal site (ES-LJu) the maximum JS coefficient is obtained with a half-time of 20 for the first growing season and 25 days for the second one (Table A1.2). Estimating the halftime of the drivers per site is a prerequisite for optimizing the predictions with the circular regressions in the next step. For most of the sites, the JS correlation coefficient is maximum between 0.98 and 0.85 (Figure A1.6), only 5 sites have a JS coefficient of less than 0.8: US-Ton, IT-MBo, IT-Ro2, US-Wkg, BR-Sa1. For ES-LJu the JS coefficient for the first growing season is 0.94 and 0.93 for the second one (Table A1.2).

Our results of the optimum halftime parameter between 2 and 100 days for all sites are similar to the time window length of 15 to 120 days required to explain the variations on the leaf unfolding for different tree species in Europe (Fu et al., 2015). Or, the time window length of 45 to 95 days to explain the flowering day of different plant species in Switzerland (Güsewell et al., 2017). No matter what phenological event is being analyzed all studies agree that phenological events are influenced by past climatic conditions in a cumulative form. Curiously, for the only bimodal site, the halftime parameter is similar between both growing seasons suggesting that the system memory does not change between growing seasons.

In our case, the use of a half-life decay function changes the interpretation of the optimum halftime day parameter indicating that half of the contribution is given before the halftime day in an exponential form and that the contribution of the rest of the days is low, but not equal to 0. Finally, we find that the optimum half-time is not necessarily related to the vegetation type or the predominant climate class in each site. We suggest that it could be more related to the species dominance and the spatial

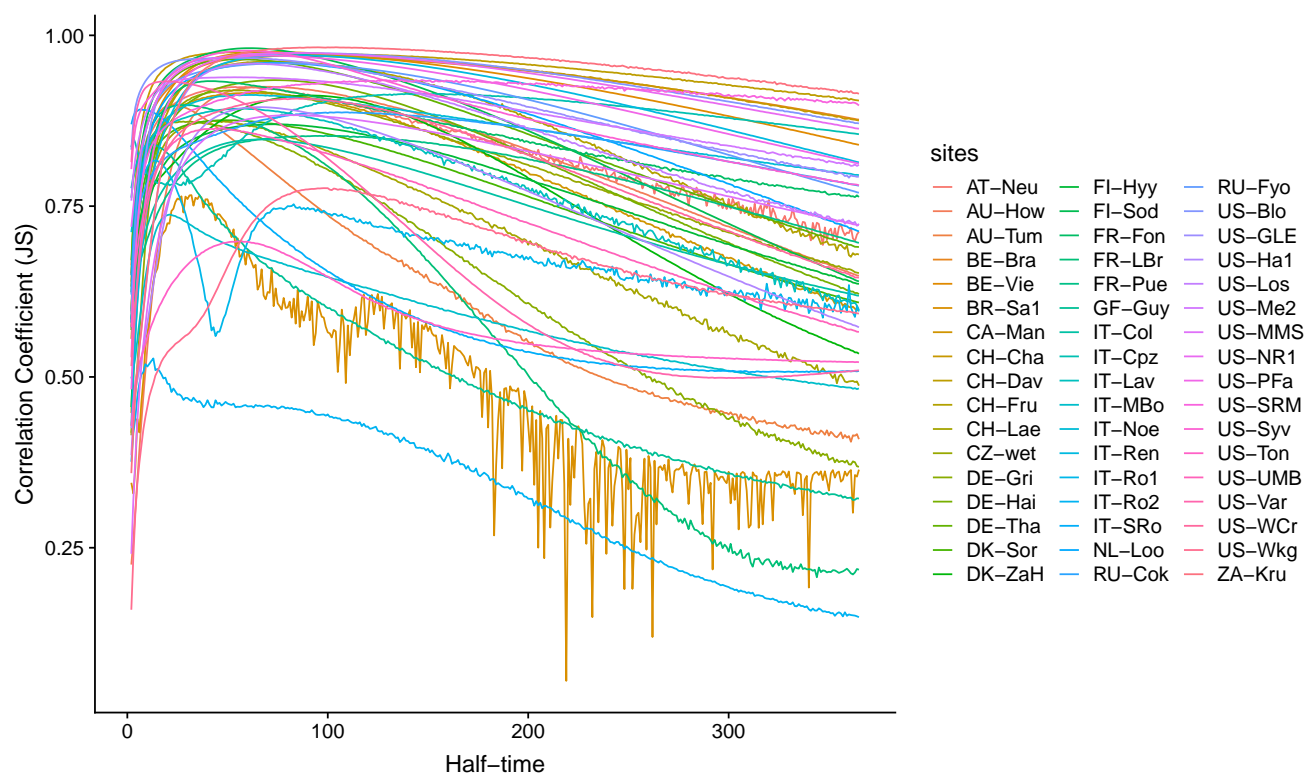

**Figure S1.** Half-time sensitivity analysis. The correlation coefficient (JS) between the observed and predicted  $\text{DOY}_{\text{GPPmax}}$  using different half-time values. Each FLUXNET site is represented with a color.

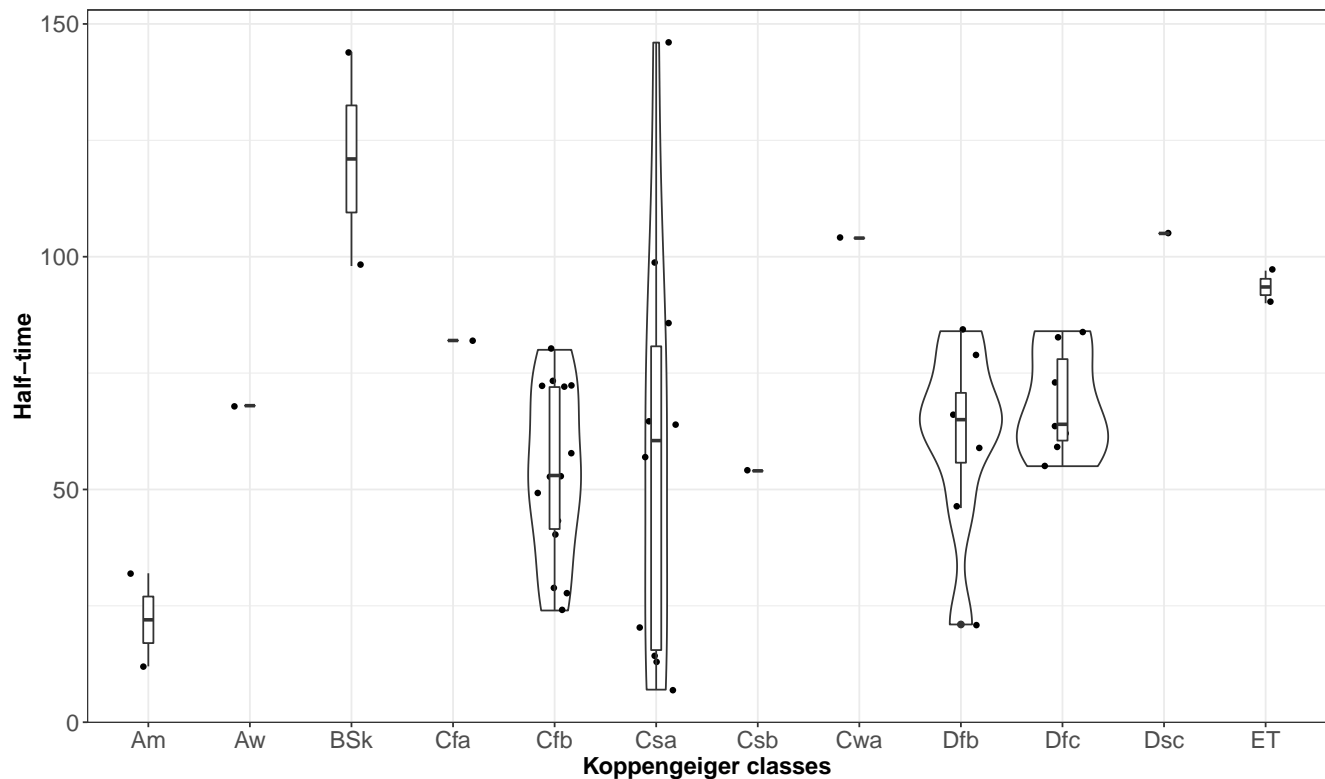

**Figure S2.** Half-time sensitivity analysis. Distribution of the half-time when the Jammalamanaka-Sarna (JS) coefficient is maximum for each FLUXNET site using as classification criterium the Koppen climate classes: Tropical monsoon climate (Am), Tropical savanna climate (Aw), Cold semi-arid climates (BSk), Humid subtropical climate (Cfa), Oceanic climate (Cfb), Hot-summer mediterranean climate (Csa), Warm-summer mediterranean climate (Csb), Humid subtropical climate (Cwa), humid continental climate (Dfb), Subarctic climate (Dfc, Dsc), and Tundra climate (ET)

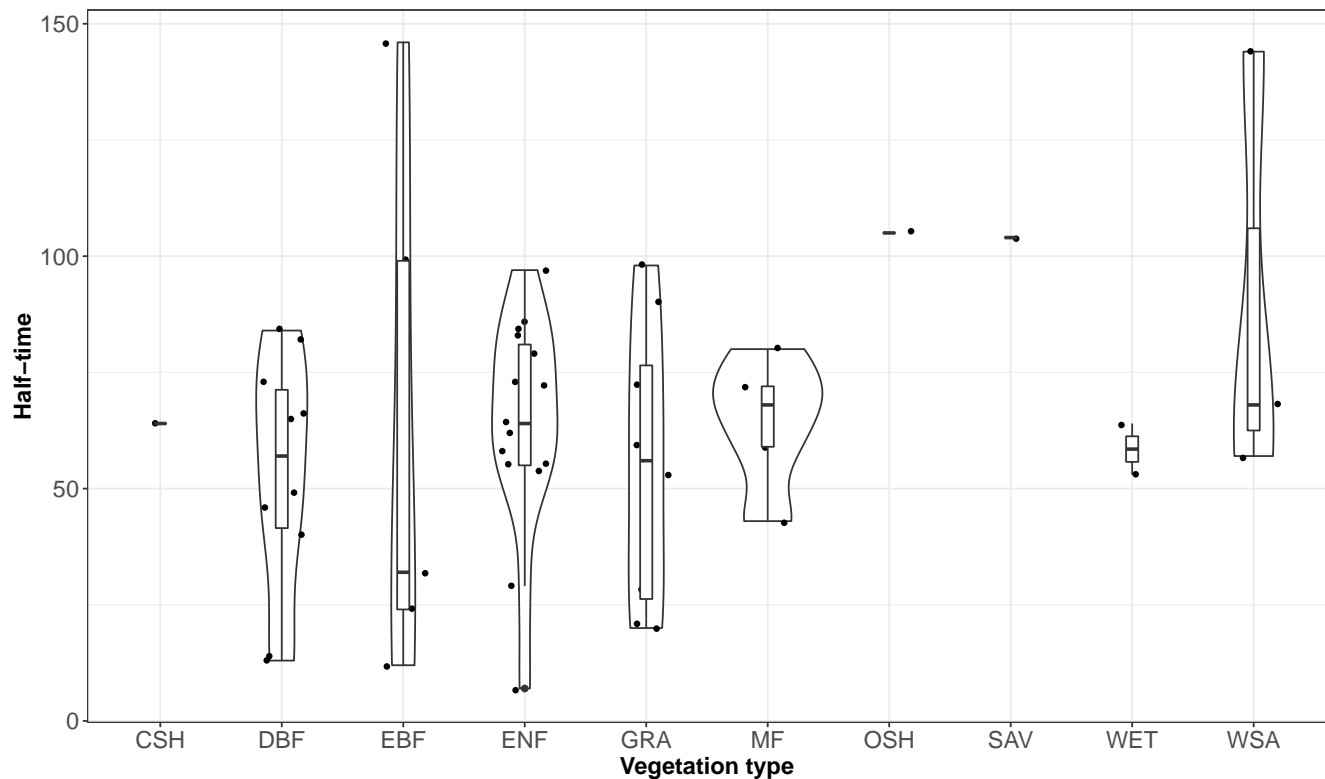

**Figure S3.** Half-time sensitivity analysis. Distribution of the optimum half-time parameter when the Jammalamadaka-Sarna (JS) coefficient is maximum per vegetation type. Closed Shrublands (CSH), Deciduous Broadleaf Forests (DBF), Evergreen Broadleaf Forests (EBF), Evergreen Needleleaf Forests (ENF), Grasslands (GRA), Mixed Forests (MF), Open Shrublands (SAV) Savannas, Permanent Wetlands (WET), Woody Savannas (WSA)

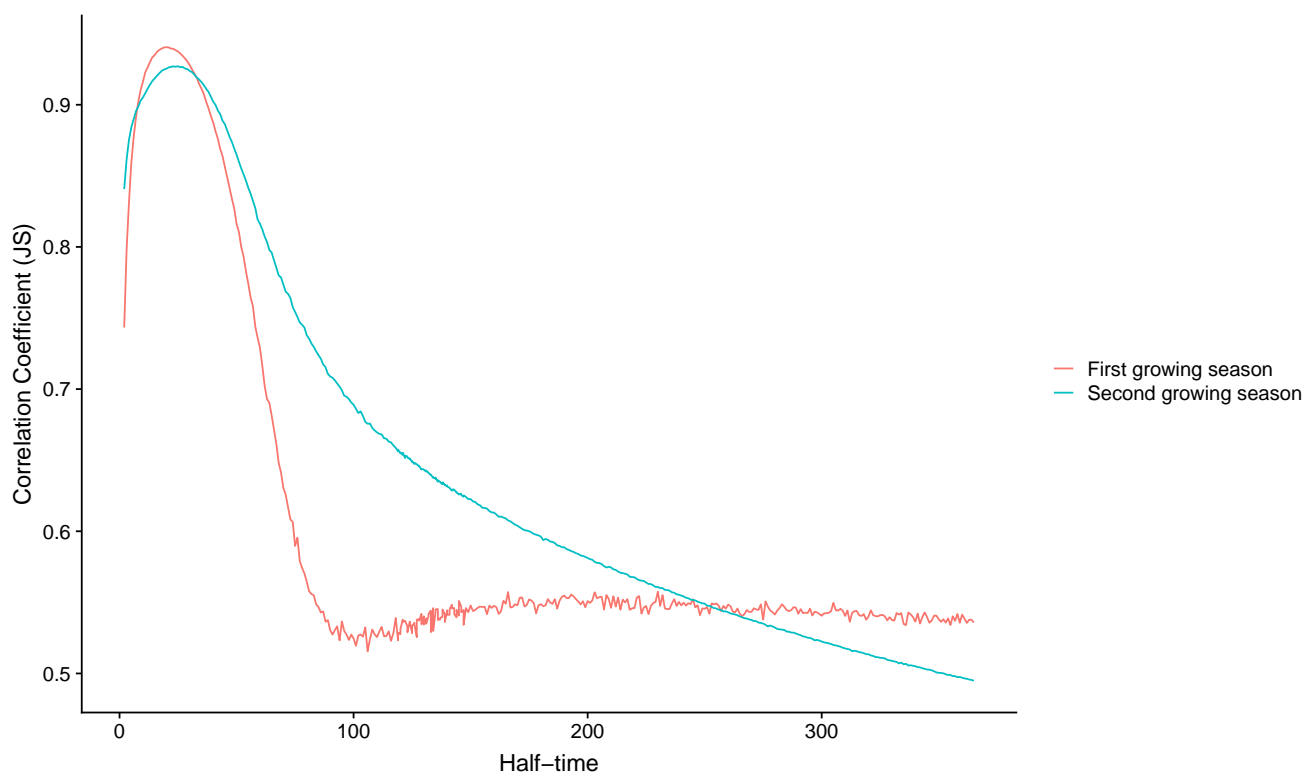

**Figure S4.** Half-time sensitivity analysis for ES-LJu the unique FLUXNET site analyzed with two growing seasons.

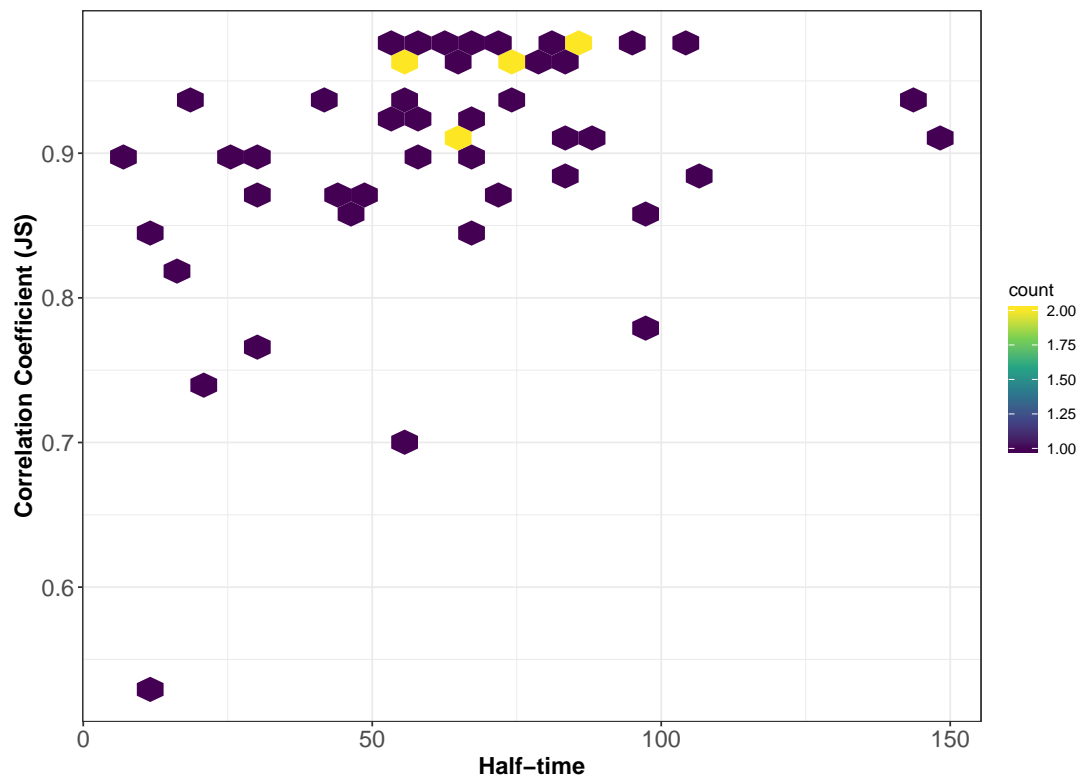

**Figure S5.** Distribution of the maximum correlation coefficient values when the optimum halftime has been used. Most of the sites have the maximum correlation coefficient when half-time is between 5 and 100 days.

Table S1: Optimum half-time coefficient and correlation coefficient per FLUXNET site. We report the name of sites, the climate class of the site following the Köppen-Geiger classification: Tropical monsoon climate (Am), Tropical savanna climate (Aw), Cold semi-arid climates (BSk), Humid subtropical climate (Cfa), Oceanic climate (Cfb), Hot-summer mediterranean climate (Csa), Warm-summer mediterranean climate (Csb), Humid subtropical climate (Cwa), humid continental climate (Dfb), Subarctic climate (Dfc, Dsc), and Tundra climate (ET). We also report the vegetation type where: We also report the Vegetation type: Closed Shrublands (CSH), Deciduous Broadleaf Forests (DBF), Evergreen Broadleaf Forest (EBF), Evergreen Needle-leaf Forests (ENF), Grasslands (GRA), Mixed Forests (MF), Open Shrublands (OSH), Savannas (SAV), Permanent Wetlands (WET), Woody Savannas (WSA).

| Site name | Köppen-Geiger class | Vegetation type | Optimum Half-time | Correlation coefficient (JS) |
|-----------|---------------------|-----------------|-------------------|------------------------------|
| US-Ha1    | Dfb                 | DBF             | 66                | 0.89                         |
| US-PFa    | Dfb                 | MF              | 68                | 0.97                         |
| BE-Bra    | Cfb                 | MF              | 80                | 0.97                         |
| BE-Vie    | Cfb                 | MF              | 72                | 0.98                         |
| DE-Tha    | Cfb                 | ENF             | 55                | 0.96                         |
| DK-Sor    | Cfb                 | DBF             | 49                | 0.88                         |
| FI-Hyy    | Dfc                 | ENF             | 73                | 0.87                         |
| IT-Col    | Csa                 | DBF             | 65                | 0.85                         |
| NL-Loo    | Cfb                 | ENF             | 72                | 0.96                         |
| CH-Dav    | ET                  | ENF             | 97                | 0.97                         |
| RU-Fyo    | Dfb                 | ENF             | 79                | 0.96                         |
| US-NR1    | Dfc                 | ENF             | 84                | 0.97                         |
| IT-Ren    | Dfc                 | ENF             | 83                | 0.97                         |
| US-MMS    | Cfa                 | DBF             | 82                | 0.88                         |
| US-WCr    | Dfb                 | DBF             | 84                | 0.91                         |
| CA-Man    | Dfc                 | ENF             | 64                | 0.92                         |
| DK-ZaH    | ET                  | GRA             | 90                | 0.91                         |
| FR-Pue    | Csa                 | EBF             | 99                | 0.85                         |
| US-Los    | Dfb                 | WET             | 64                | 0.96                         |
| US-UMB    | Dfb                 | DBF             | 46                | 0.86                         |
| US-Var    | Csa                 | GRA             | 20                | 0.93                         |
| AU-How    | Aw                  | WSA             | 68                | 0.92                         |
| AU-Tum    | Cfb                 | EBF             | 24                | 0.9                          |
| FI-Sod    | Dfc                 | ENF             | 62                | 0.98                         |

|        |     |     |     |      |
|--------|-----|-----|-----|------|
| IT-SRo | Csa | ENF | 7   | 0.89 |
| US-Syv | Dfb | MF  | 59  | 0.98 |
| US-Ton | Csa | WSA | 57  | 0.7  |
| ZA-Kru | Cwa | SAV | 104 | 0.98 |
| DE-Hai | Cfb | DBF | 73  | 0.93 |
| FR-LBr | Cfb | ENF | 29  | 0.9  |
| IT-Cpz | Csa | EBF | 146 | 0.91 |
| US-Me2 | Csb | ENF | 54  | 0.94 |
| IT-Lav | Cfb | ENF | 58  | 0.89 |
| RU-Cok | Dsc | OSH | 105 | 0.89 |
| AT-Neu | Dfc | GRA | 59  | 0.92 |
| CH-Lae | Cfb | MF  | 43  | 0.88 |
| DE-Gri | Cfb | GRA | 28  | 0.87 |
| GF-Guy | Am  | EBF | 12  | 0.84 |
| IT-MBo | Dfb | GRA | 21  | 0.74 |
| IT-Noe | Csa | CSH | 64  | 0.91 |
| IT-Ro2 | Csa | DBF | 13  | 0.53 |
| US-Blo | Csa | ENF | 86  | 0.97 |
| US-GLE | Dfc | ENF | 55  | 0.97 |
| US-SRM | BSk | WSA | 144 | 0.93 |
| US-Wkg | BSk | GRA | 98  | 0.78 |
| BR-Sa1 | Am  | EBF | 32  | 0.77 |
| CH-Cha | Cfb | GRA | 53  | 0.98 |
| CH-Fru | Cfb | GRA | 72  | 0.96 |
| FR-Fon | Cfb | DBF | 40  | 0.93 |
| CZ-wet | Cfb | WET | 53  | 0.92 |
| IT-Ro1 | Csa | DBF | 14  | 0.82 |



**Table S2.** Results of the optimum half-time and the maximum correlation coefficient for " Llano de los Juanes", Spain with Köppen-Geiger class: Hot-summer Mediterranean climate (Csa) and vegetation type: Open Shrublands (OSH)

| Site name | Köppen-Geiger class | Vegetation type | DOY <sub>GPPmax</sub> (GS 1) |                               | DOY <sub>GPPmax</sub> (GS 2) |                               |
|-----------|---------------------|-----------------|------------------------------|-------------------------------|------------------------------|-------------------------------|
|           |                     |                 | Optimum Halftime             | Correlation co-efficient (JS) | Optimum Halftime             | Correlation co-efficient (JS) |
| ES-Lju    | Csa                 | OSH             | 20                           | 0.94                          | 25                           | 0.93                          |

2 Phenological summary of the FLUXNET sites (Recovering  $\text{DOY}_{\text{GPPmax}}$ )

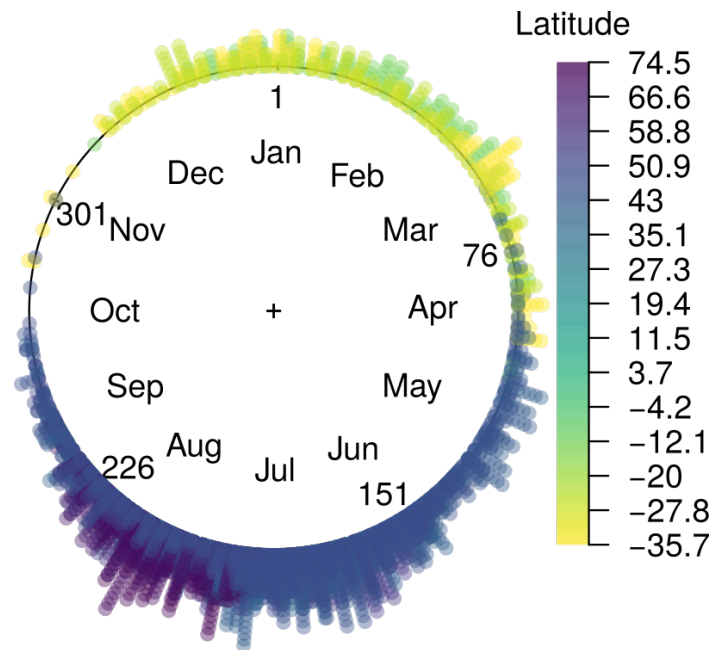

**Figure S6.**  $\text{DOY}_{\text{GPPmax}}$  distribution across the latitudinal gradient. Most of the  $\text{DOY}_{\text{GPPmax}}$  is reached at the middle of the year. This pattern is generated by the geographical trend of the location of the FLUXNET network in the Northern hemisphere.

Table S3: Mean angular direction and the standard deviation of  $\text{DOY}_{\text{GPPmax}}$  for ecosystems with one growing season per year.

| Site name | Mean $\text{DOY}_{\text{GPPmax}}$ (days) | SD $\text{DOY}_{\text{GPPmax}}$ (days) |
|-----------|------------------------------------------|----------------------------------------|
| US-Ha1    | 195.2                                    | 19.5                                   |
| US-PFa    | 196.6                                    | 21.6                                   |
| BE-Bra    | 196.71                                   | 25.35                                  |
| BE-Vie    | 192.28                                   | 29.9                                   |
| DE-Tha    | 182.91                                   | 27.4                                   |
| DK-Sor    | 169.96                                   | 13.96                                  |
| FI-Hyy    | 199.93                                   | 17.74                                  |
| IT-Col    | 187.75                                   | 23.84                                  |
| NL-Loo    | 210.27                                   | 25.82                                  |
| CH-Dav    | 180.99                                   | 38.69                                  |
| RU-Fyo    | 192.14                                   | 23.17                                  |

|        |        |       |
|--------|--------|-------|
| US-NR1 | 201.98 | 28.79 |
| IT-Ren | 193.55 | 32.34 |
| US-MMS | 183.59 | 22.71 |
| US-WCr | 198.26 | 20.02 |
| CA-Man | 215.87 | 19.96 |
| DK-ZaH | 204.39 | 10.3  |
| FR-Pue | 159.97 | 34.07 |
| US-Los | 194.81 | 13.46 |
| US-UMB | 189.13 | 20.5  |
| US-Var | 95.95  | 21.82 |
| AU-How | 28.77  | 30.87 |
| AU-Tum | 24.29  | 46.9  |
| FI-Sod | 214.35 | 15.66 |
| IT-SRo | 142.6  | 28.3  |
| US-Syv | 194.9  | 25.65 |
| US-Ton | 114.63 | 20    |
| ZA-Kru | 15.35  | 37.09 |
| DE-Hai | 190.26 | 22.84 |
| FR-LBr | 177.35 | 23.83 |
| IT-Cpz | 154.5  | 46.04 |
| US-Me2 | 182.5  | 26.15 |
| IT-Lav | 167.19 | 37.11 |
| RU-Cok | 209.61 | 11.48 |
| AT-Neu | 161.46 | 33.73 |
| CH-Lae | 185.32 | 30.71 |
| DE-Gri | 178.61 | 33.51 |
| GF-Guy | 214.86 | 41.17 |
| IT-MBo | 169.51 | 12.22 |
| IT-Noe | 120.71 | 28.96 |
| IT-Ro2 | 155.48 | 18.69 |
| US-Blo | 199.04 | 33.38 |
| US-GLE | 209.55 | 17.46 |
| US-SRM | 227.65 | 17.66 |

|        |        |       |
|--------|--------|-------|
| US-Wkg | 228.54 | 11.26 |
| BR-Sa1 | 325.24 | 38.49 |
| CH-Cha | 201.24 | 38.2  |
| CH-Fru | 163.9  | 39.97 |
| FR-Fon | 179.49 | 24.11 |
| CZ-wet | 169.88 | 17.68 |
| IT-Ro1 | 148.23 | 11.33 |

**Table S4.** Mean angular direction and standard deviation of  $\text{DOY}_{\text{GPPmax}}$  for ecosystems with two growing seasons

| Site name | Koppen | Vegetation type | $\text{DOY}_{\text{GPPmax}}$ (GS 1) |           | $\text{DOY}_{\text{GPPmax}}$ (GS 2) |           |
|-----------|--------|-----------------|-------------------------------------|-----------|-------------------------------------|-----------|
|           |        |                 | Mean (DOY)                          | SD (days) | Mean (DOY)                          | SD (days) |
| ES-Lju    | Csa    | OSH             | 143.62                              | 17.84     | 302.63                              | 19.18     |

### 3 Similarity of regression coefficients per vegetation type and climate classes

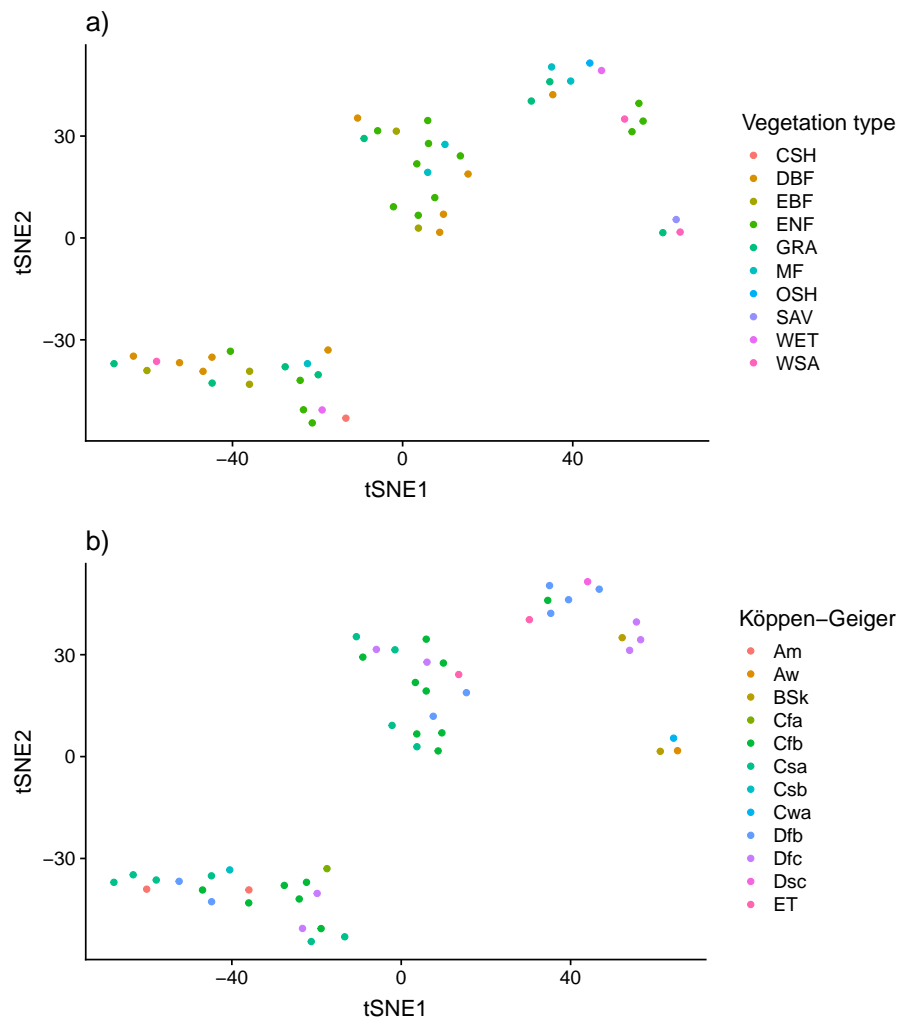

**Figure S7.** Similarity between the regression coefficients of air temperature, shortwave incoming radiation, precipitation and vapor pressure deficit of the circular regression for each FLUXNET site. t-Distributed Stochastic Neighbor Embedding (t-SNE) analysis was performed using perplexity = 5. a). Colors per the vegetation: Closed Shrublands (CSH), Deciduous Broadleaf Forests (DBF), Evergreen Broadleaf Forest (EBF), Evergreen Needleleaf Forests (ENF), Grasslands (GRA), Mixed Forests (MF), Open Shrublands (OSH), Savannas (SAV), Permanent Wetlands (WET), Woody Savannas (WSA). c) Colors per Köppen-Geiger climate classes: Tropical monsoon climate (Am), Tropical savanna climate (Aw), Cold semi-arid climates (BSk), Humid subtropical climate (Cfa), Oceanic climate (Cfb), Hot-summer mediterranean climate (Csa), Warm-summer mediterranean climate (Csb), Humid subtropical climate (Cwa), humid continental climate (Dfb), Subarctic climate (Dfc, Dsc), and Tundra climate (ET)

## References

- 30 Fu, Y. H., Zhao, H., Piao, S., Peaucelle, M., Peng, S., Zhou, G., Ciais, P., Huang, M., Menzel, A., Peñuelas, J., Song, Y., Vitasse, Y., Zeng, Z., and Janssens, I. A.: Declining global warming effects on the phenology of spring leaf unfolding, *Nature*, 526, 104–107, <https://doi.org/10.1038/nature15402>, <https://www.nature.com/articles/nature15402>, 2015.
- Güsewell, S., Furrer, R., Gehrig, R., and Pietragalla, B.: Changes in temperature sensitivity of spring phenology with recent climate warming in Switzerland are related to shifts of the preseason, *Global Change Biology*, 23, 5189–5202, <https://doi.org/10.1111/gcb.13781>, <http://onlinelibrary.wiley.com/doi/10.1111/gcb.13781/abstract><http://onlinelibrary.wiley.com/store/10.1111/gcb.13781/asset/gcb13781.pdf?v=1&t=jdmyu5yf&s=8101659af8b310121d3227eb531cf4166cbfc8a8>, 2017.
- 35
